# Supplementary material
Source: PubMed Central journal article supplement (PMC10669912)
Supplement: NIHMS1923957-supplement-SI.pdf [file NIHMS1923957-supplement-SI.pdf]

**Supplementary Information:**

Interaction of TiO<sub>2</sub> nanoparticles with lung fluid proteins and the resulting macrophage inflammatory response

Karsten M. Poulsen,<sup>a</sup> Michaela C. Albright,<sup>b</sup> Nicholas J. Niemuth,<sup>a,c</sup> Robert M. Tighe,<sup>\*b</sup> and Christine K. Payne<sup>\*a</sup>

christine.payne@duke.edu

- a. Thomas Lord Department of Mechanical Engineering and Materials Science, Duke University, Durham, North Carolina, USA 27705
- b. Department of Medicine, Duke University School of Medicine, Durham, North Carolina, USA 27710
- c. Present address: Department of Biomedical Engineering, University of North Carolina at Chapel Hill School of Medicine, Chapel Hill, North Carolina, 27599

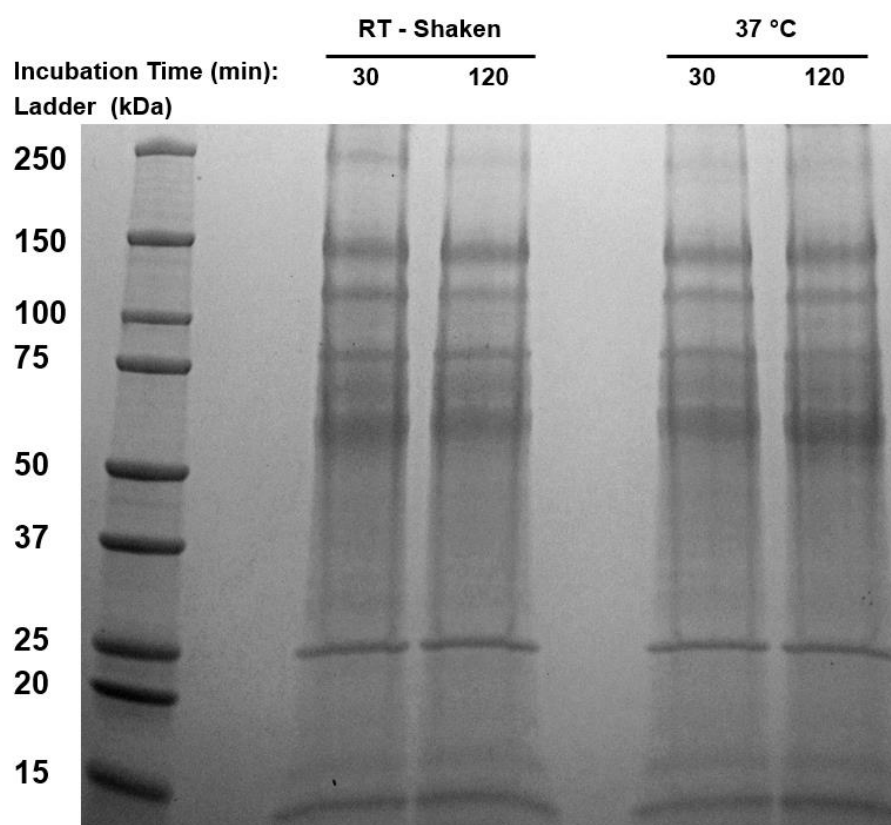

**Fig. S1** Gel electrophoresis showing the proteins present in coronas formed from FBS (10%) on TiO<sub>2</sub> NPs at room temperature (RT; ~22 °C) and 37 °C with incubation times of 30 min and 120 min. The samples at RT were incubated on an orbital shaker. The samples incubated at 37 °C were static. The 30 min, RT-shaken condition is identical to the preparation of samples as described in the main text.

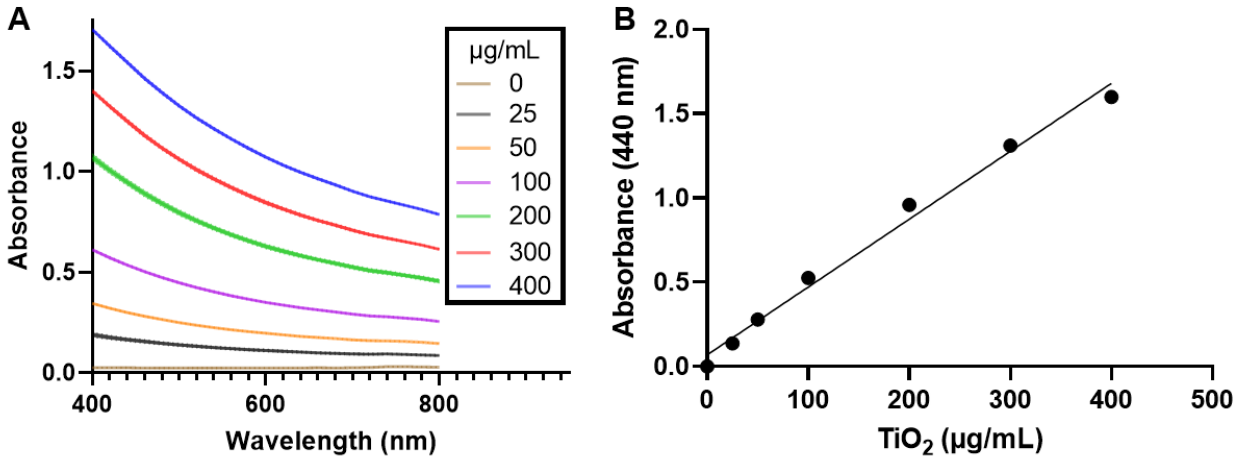

**Fig. S2** The concentration of TiO<sub>2</sub> NPs was determined using a calibration curve. (A) Known concentrations of TiO<sub>2</sub> NPs (0-400 µg/mL) were suspended in PBS. Absorption spectra were measured using a plate reader (SpectraMax, iD3, Molecular Devices, San Jose, CA). Solid lines show the mean absorbance and shading shows standard deviation (n=3). (B) TiO<sub>2</sub> NP absorbance was measured at 440 nm. Error bars showing standard deviation are too small to see. Linear regression was performed in GraphPad Prism. R<sup>2</sup> = 0.989. The limit of detection was determined to be 50 µg/mL. A minimum concentration of 250 µg/mL was used for experiments.

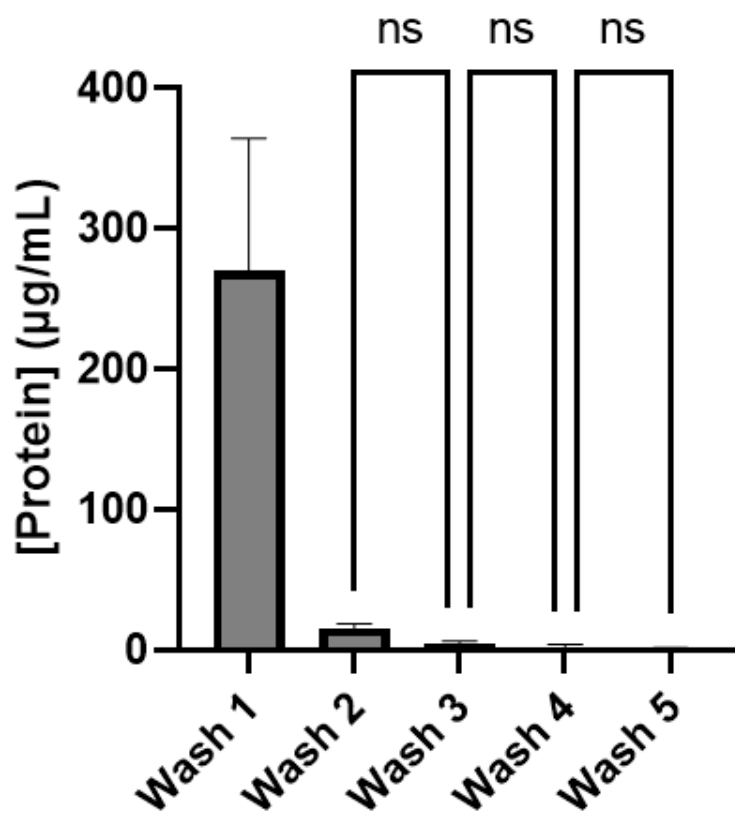

**Fig. S3** Concentration of protein present in the supernatant following “washing” of protein-TiO<sub>2</sub> NP complexes incubated with BSA (10 mg/mL). TiO<sub>2</sub> NPs were incubated with BSA for 30 min at RT and washed with PBS (n=3). BSA (10 mg/mL) is used as it is the highest incubation concentration used for protein corona formation. The first supernatant, Wash 0, is not shown because it has much higher protein concentration and is not typically measured. Error bars show standard deviation. The limit of detection of the BCA assay is 69  $\mu\text{g/mL}$ . Significance was determined using a one-way ANOVA with a post hoc Tukey test.

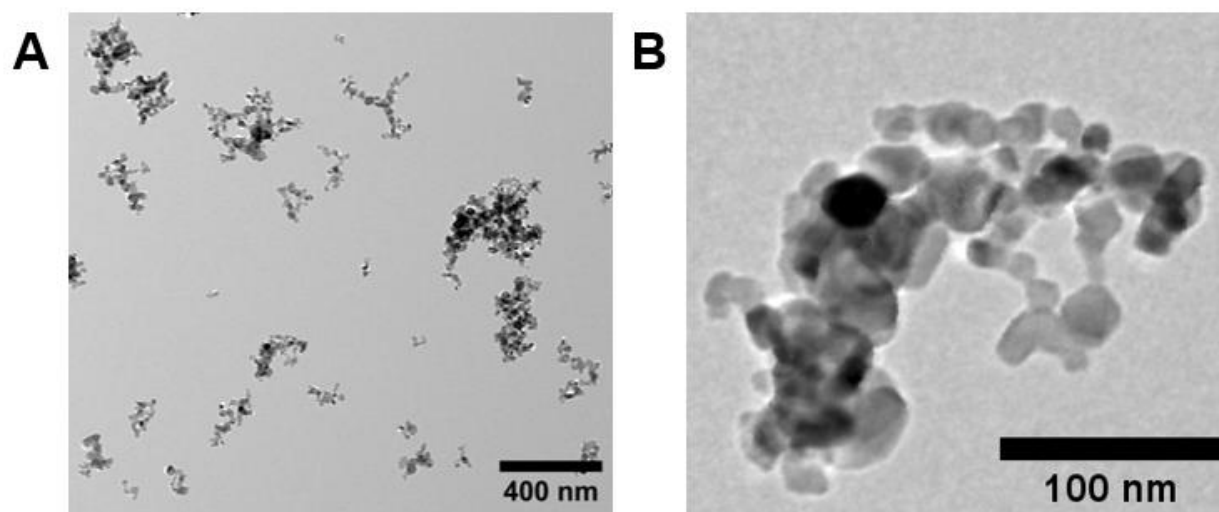

**Fig. S4** Representative transmission electron microscopy (TEM) image (FEI Tecnai G2 Twin, 160 kV, 14.5 kX) of the TiO<sub>2</sub> NPs used in these experiments. TiO<sub>2</sub> NPs were suspended in ultrapure water by sonication (5 min, RT; Qsonica) and dried on a 400 mesh copper grid (#CF400-Cu, Electron Microscopy Sciences, Hatfield Township, PA).

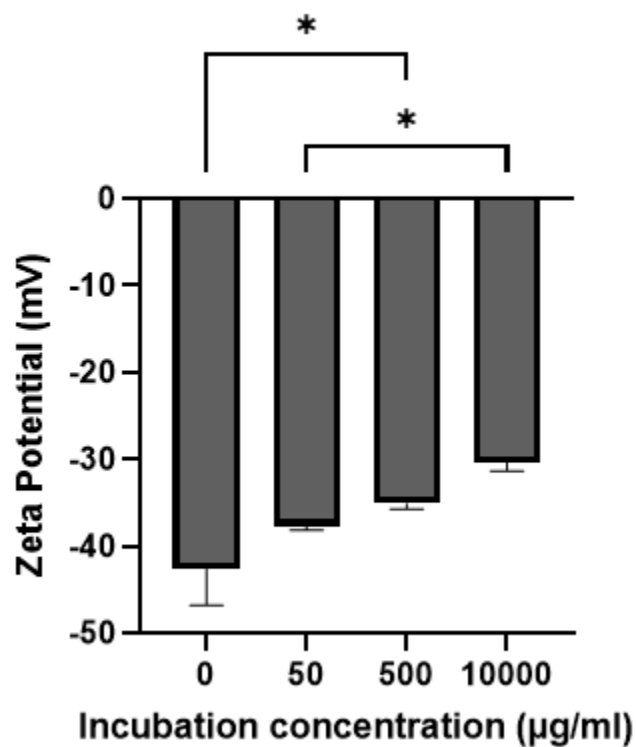

**Fig. S5** Increasing the amount of BSA present during the formation of the protein corona increases the zeta potential of the protein-TiO<sub>2</sub> NP complexes. Experiments were carried out in triplicate. Error bars show standard deviation. Significance was determined using a one-way ANOVA with a post hoc Tukey test. \*p<0.05.

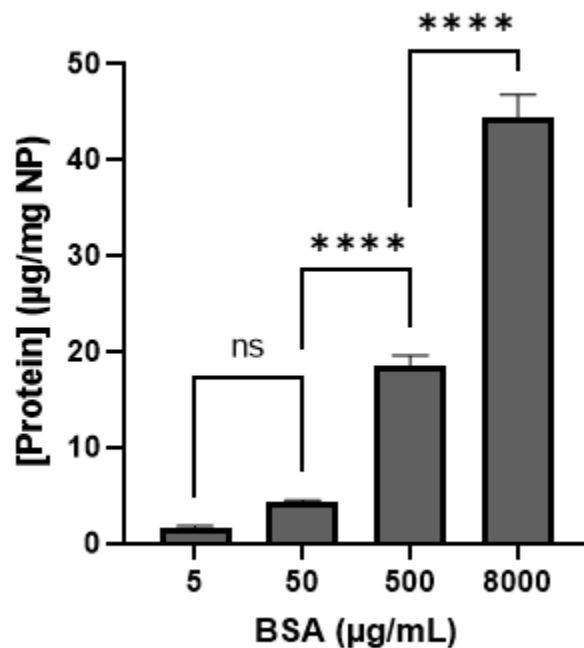

**Fig. S6** Increasing the amount of BSA (5 µg/mL – 8000 µg/mL) present during the formation of the protein corona increases the concentration of protein present in the corona formed on TiO<sub>2</sub> NPs. Experiments were carried out in triplicate. Error bars show standard deviation. Significance was determined using a one-way ANOVA with a post hoc Tukey test. \*\*\*\*p<0.0001.

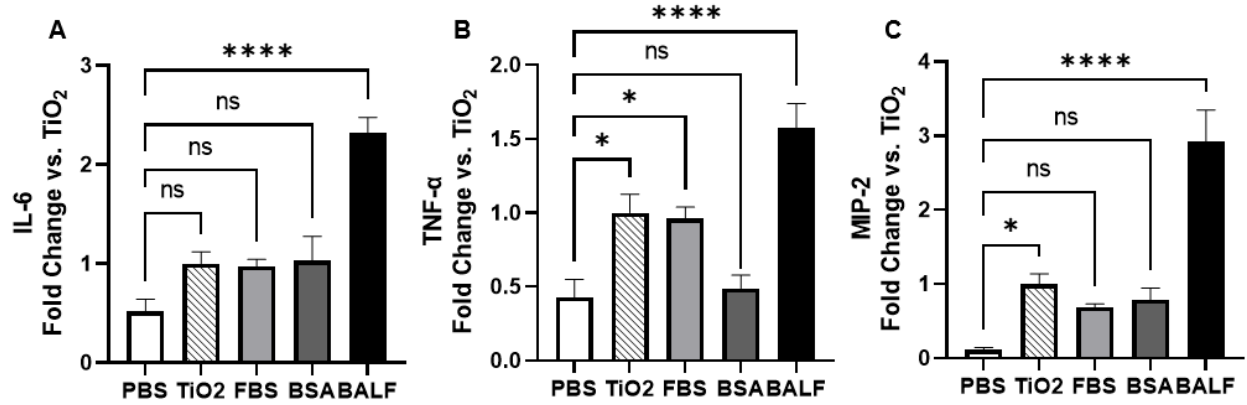

**Fig. S7** (A) IL-6, (B) TNF- $\alpha$ , and (C) MIP-2 showed elevated expression levels in response to TiO<sub>2</sub> NPs with and without proteins coronas compared to the use of PBS as vehicle control. Significance was determined using a one-way ANOVA with a post hoc Tukey test. This is the same dataset and one way ANOVA as shown in Fig. 4. \* $p < 0.05$ , \*\*\*\* $p < 0.0001$ .
